# Supplementary material for: The Dark Side Is Not Fastidious – Dark Septate Endophytic Fungi of Native and Invasive Plants of Semiarid Sandy Areas
Source: PubMed Central journal article supplement (PMC3290574; doi:10.1371/journal.pone.0032570), 2012-02-29

**Figure S1** The three sampling site on the Great Hungarian Plain; Bugac (A), Fülöpháza (B) and Tatárszentgyörgy (C).

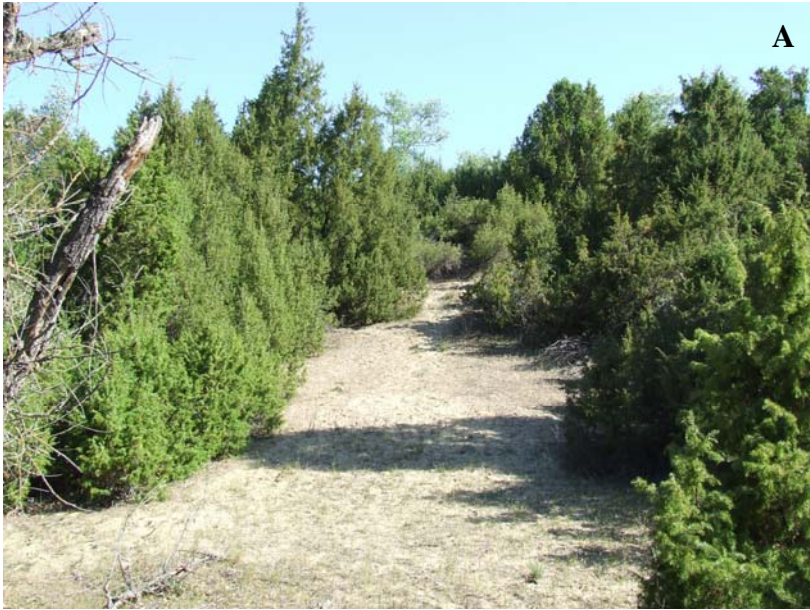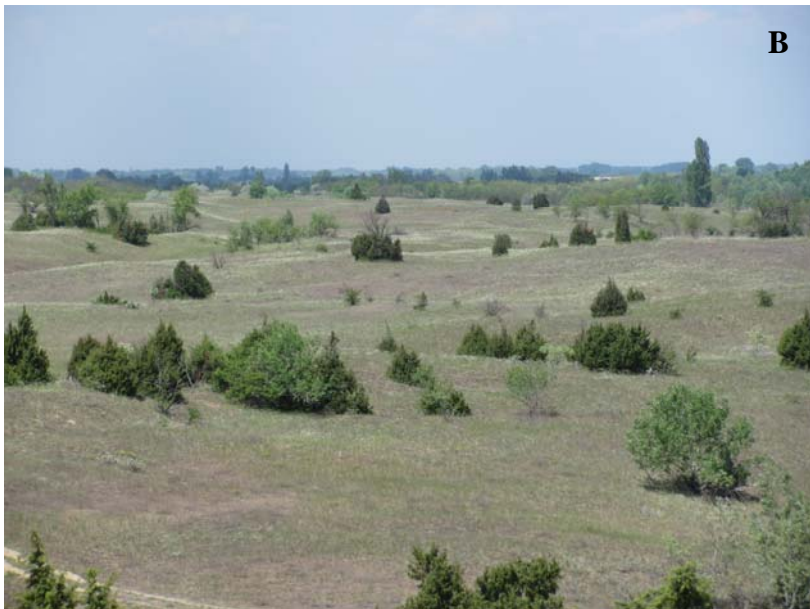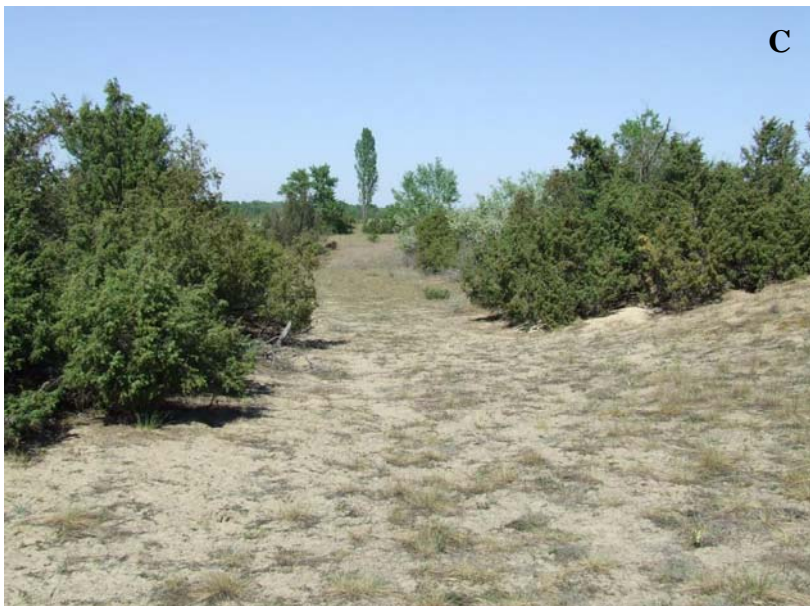

Supplement: pone.0032570.s001.pdf [file pone.0032570.s001.pdf]
