# Supplementary material for: The Dark Side Is Not Fastidious – Dark Septate Endophytic Fungi of Native and Invasive Plants of Semiarid Sandy Areas
Source: PubMed Central journal article supplement (PMC3290574; doi:10.1371/journal.pone.0032570), 2012-02-29
Supplement: pone.0032570.s005.pdf [file pone.0032570.s005.pdf]

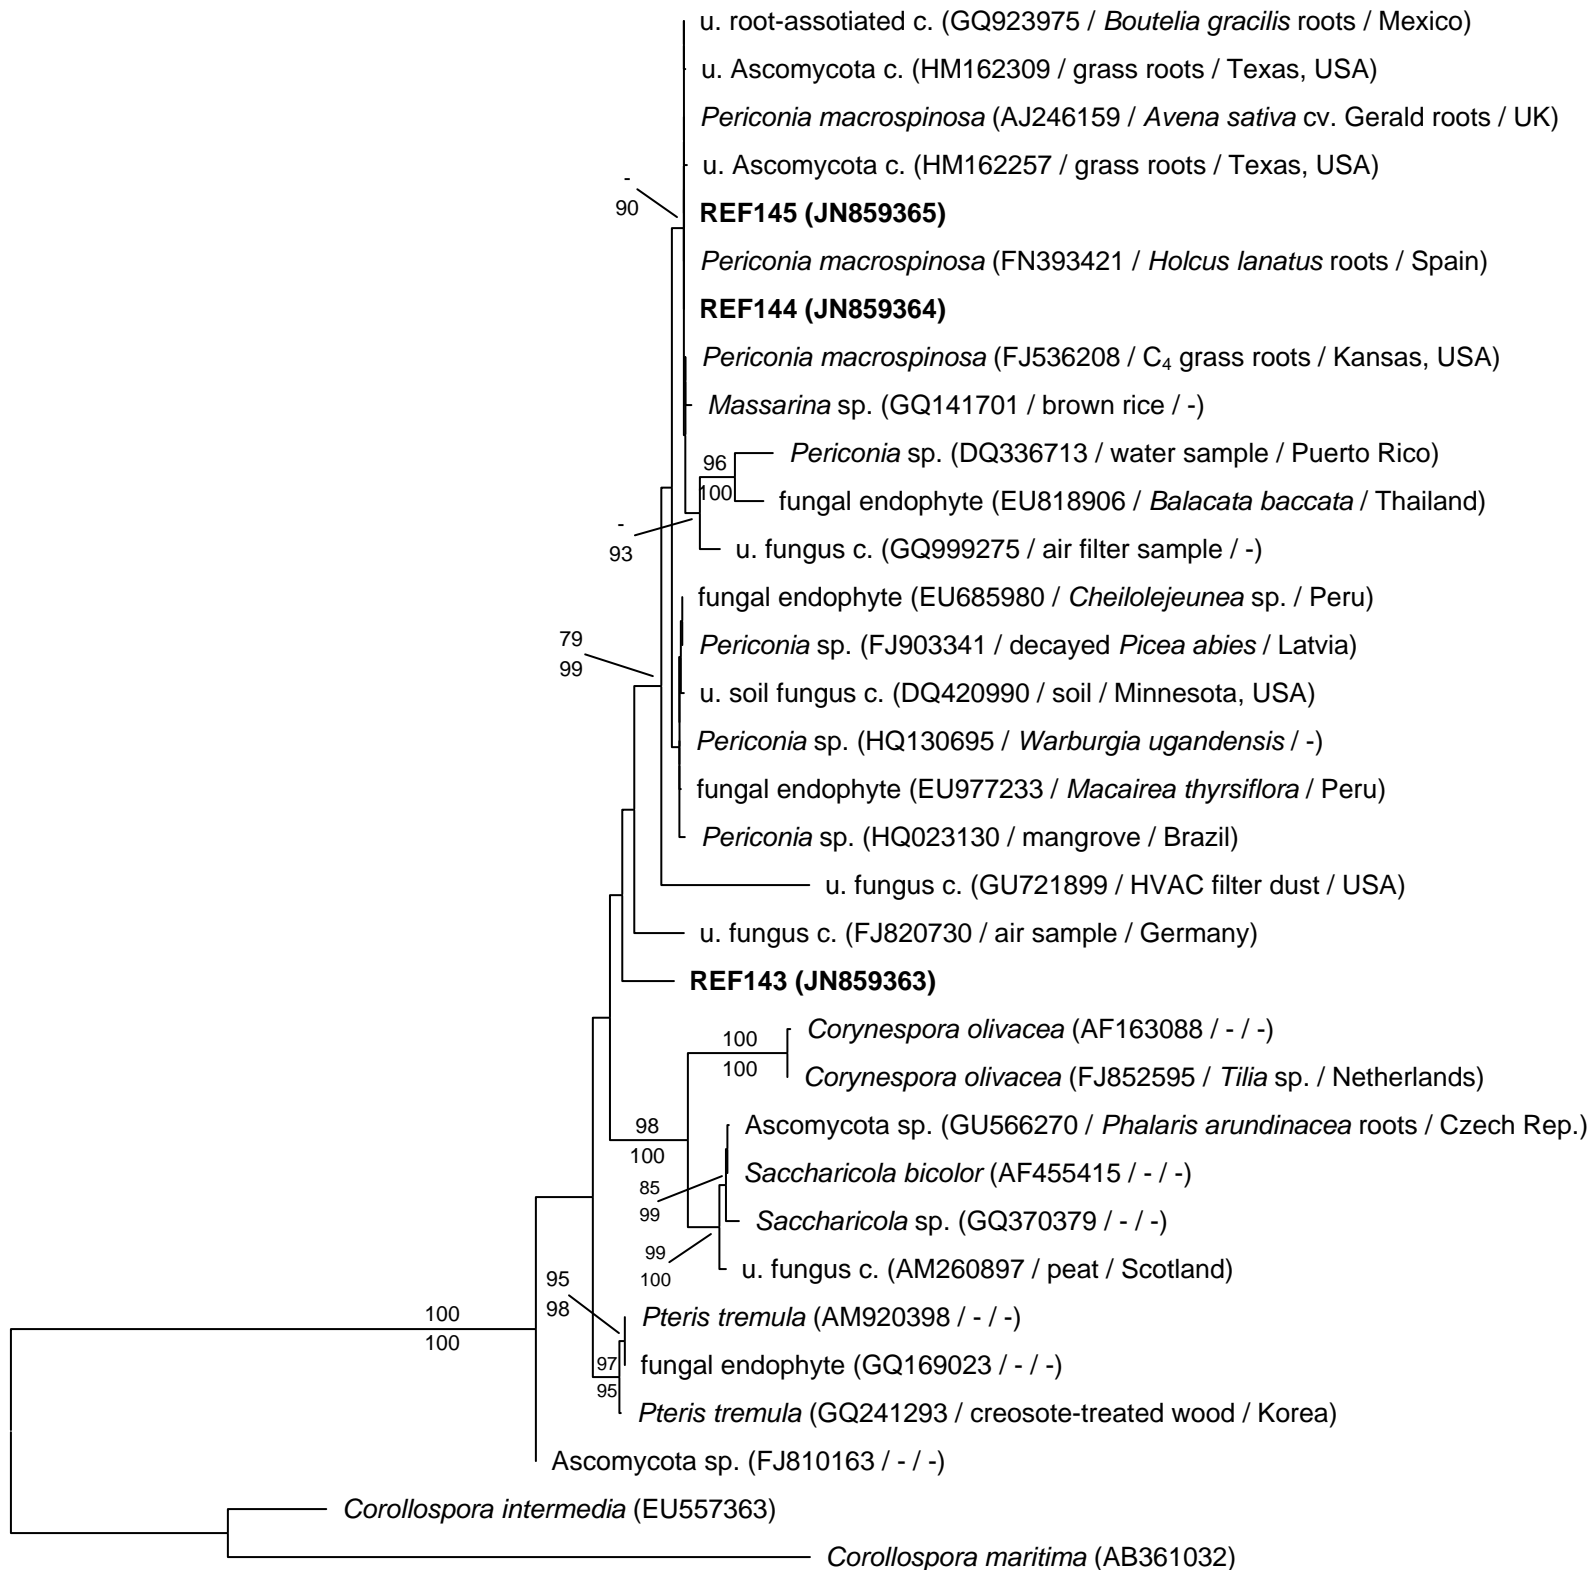

0.1

**Figure S5** The maximum likelihood (ML) tree of the ITS sequences of representatives of group DSE-8 and similar sequences from GenBank. Sequences obtained in this study are shown in bold. *Corollospora intermedia* (EU557363) was used as outgroup. Accession number, isolation source and geographic origin of sequences from public databases are shown. NJ bootstrap (not shown below 70%) values are above and the Bayesian posterior probabilities as percentage (not shown below 90%) are below the branches. Abbreviations: uncultured (u.), clone (c.). Bar = 0.1 expected change on one nucleotide.
