# Supplementary material for: The Dark Side Is Not Fastidious – Dark Septate Endophytic Fungi of Native and Invasive Plants of Semiarid Sandy Areas
Source: PubMed Central journal article supplement (PMC3290574; doi:10.1371/journal.pone.0032570), 2012-02-29
Supplement: pone.0032570.s006.pdf [file pone.0032570.s006.pdf]

**Table S1** The list of the 241 isolates with their name, group, accession number of ITS sequences, host plant, sampling site and season of the collection.

| Isolate | Group | Accession | Host                       | Site             | Season |
|---------|-------|-----------|----------------------------|------------------|--------|
| REF001  | DSE-1 | JN859221  | <i>Juniperus communis</i>  | Bugac            | Summer |
| REF002  | DSE-1 | JN859222  | <i>Juniperus communis</i>  | Tatárszentgyörgy | Spring |
| REF003  | DSE-1 | JN859223  | <i>Helianthemum ovatum</i> | Fülöpháza        | Summer |
| REF004  | DSE-1 | JN859224  | <i>Juniperus communis</i>  | Bugac            | Summer |
| REF005  | DSE-1 | JN859225  | <i>Juniperus communis</i>  | Bugac            | Summer |
| REF006  | DSE-1 | JN859226  | <i>Juniperus communis</i>  | Bugac            | Summer |
| REF007  | DSE-1 | JN859227  | <i>Juniperus communis</i>  | Tatárszentgyörgy | Summer |
| REF008  | DSE-1 | JN859228  | <i>Juniperus communis</i>  | Bugac            | Fall   |
| REF009  | DSE-1 | JN859229  | <i>Juniperus communis</i>  | Fülöpháza        | Fall   |
| REF010  | DSE-1 | JN859230  | <i>Juniperus communis</i>  | Tatárszentgyörgy | Spring |
| REF011  | DSE-1 | JN859231  | <i>Juniperus communis</i>  | Fülöpháza        | Summer |
| REF012  | DSE-1 | JN859232  | <i>Ailanthus altissima</i> | Fülöpháza        | Summer |
| REF013  | DSE-1 | JN859233  | <i>Helianthemum ovatum</i> | Fülöpháza        | Summer |
| REF014  | DSE-1 | JN859234  | <i>Juniperus communis</i>  | Tatárszentgyörgy | Fall   |
| REF015  | DSE-1 | JN859235  | <i>Juniperus communis</i>  | Fülöpháza        | Fall   |
| REF016  | DSE-1 | JN859236  | <i>Juniperus communis</i>  | Tatárszentgyörgy | Spring |
| REF017  | DSE-1 | JN859237  | <i>Juniperus communis</i>  | Fülöpháza        | Spring |
| REF018  | DSE-1 | JN859238  | <i>Juniperus communis</i>  | Fülöpháza        | Spring |
| REF019  | DSE-1 | JN859239  | <i>Juniperus communis</i>  | Bugac            | Spring |
| REF020  | DSE-1 | JN859240  | <i>Juniperus communis</i>  | Fülöpháza        | Spring |
| REF021  | DSE-1 | JN859241  | <i>Juniperus communis</i>  | Bugac            | Fall   |
| REF022  | DSE-1 | JN859242  | <i>Juniperus communis</i>  | Tatárszentgyörgy | Fall   |
| REF023  | DSE-1 | JN859243  | <i>Juniperus communis</i>  | Fülöpháza        | Summer |
| REF024  | DSE-1 | JN859244  | <i>Ailanthus altissima</i> | Fülöpháza        | Summer |
| REF025  | DSE-1 | JN859245  | <i>Juniperus communis</i>  | Bugac            | Fall   |
| REF026  | DSE-1 | JN859246  | <i>Juniperus communis</i>  | Tatárszentgyörgy | Summer |
| REF027  | DSE-1 | JN859247  | <i>Juniperus communis</i>  | Tatárszentgyörgy | Summer |
| REF028  | DSE-1 | JN859248  | <i>Asclepias syriaca</i>   | Fülöpháza        | Summer |
| REF029  | DSE-1 | JN859249  | <i>Juniperus communis</i>  | Fülöpháza        | Fall   |
| REF030  | DSE-1 | JN859250  | <i>Juniperus communis</i>  | Fülöpháza        | Fall   |
| REF031  | DSE-1 | JN859251  | <i>Juniperus communis</i>  | Bugac            | Spring |
| REF032  | DSE-1 | JN859252  | <i>Juniperus communis</i>  | Bugac            | Spring |
| REF033  | DSE-1 | JN859253  | <i>Juniperus communis</i>  | Bugac            | Spring |
| REF034  | DSE-1 | JN859254  | <i>Juniperus communis</i>  | Fülöpháza        | Spring |
| REF035  | DSE-1 | JN859255  | <i>Juniperus communis</i>  | Bugac            | Spring |
| REF036  | DSE-1 | JN859256  | <i>Juniperus communis</i>  | Fülöpháza        | Spring |
| REF037  | DSE-1 | JN859257  | <i>Populus alba</i>        | Fülöpháza        | Summer |
| REF038  | DSE-1 | JN859258  | <i>Juniperus communis</i>  | Fülöpháza        | Spring |
| REF039  | DSE-1 | JN859259  | <i>Juniperus communis</i>  | Fülöpháza        | Spring |
| REF040  | DSE-1 | JN859260  | <i>Juniperus communis</i>  | Fülöpháza        | Spring |
| REF041  | DSE-1 | JN859261  | <i>Juniperus communis</i>  | Fülöpháza        | Spring |
| REF042  | DSE-1 | JN859262  | <i>Populus alba</i>        | Fülöpháza        | Summer |
| REF043  | DSE-1 | JN859263  | <i>Juniperus communis</i>  | Fülöpháza        | Summer |
| REF044  | DSE-1 | JN859264  | <i>Juniperus communis</i>  | Fülöpháza        | Summer |
| REF045  | 1     | JN859265  | <i>Juniperus communis</i>  | Fülöpháza        | Spring |
| REF046  | 2     | JN859266  | <i>Juniperus communis</i>  | Tatárszentgyörgy | Spring |
| REF047  | 3     | JN859267  | <i>Helianthemum ovatum</i> | Fülöpháza        | Summer |
| REF048  | 4     | JN859268  | <i>Juniperus communis</i>  | Bugac            | Fall   |
| REF049  | 4     | JN859269  | <i>Juniperus communis</i>  | Tatárszentgyörgy | Spring |
| REF050  | 5     | JN859270  | <i>Juniperus communis</i>  | Bugac            | Spring |

|        |       |          |                                |                  |        |
|--------|-------|----------|--------------------------------|------------------|--------|
| REF051 | DSE-2 | JN859271 | <i>Festuca procumbens</i>      | Fülöpháza        | Summer |
| REF052 | DSE-2 | JN859272 | <i>Asclepias syriaca</i>       | Fülöpháza        | Summer |
| REF053 | DSE-2 | JN859273 | <i>Ailanthus altissima</i>     | Tatárszentgyörgy | Summer |
| REF054 | DSE-2 | JN859274 | <i>Helianthemum ovatum</i>     | Fülöpháza        | Spring |
| REF055 | DSE-2 | JN859275 | <i>Juniperus communis</i>      | Tatárszentgyörgy | Spring |
| REF056 | DSE-2 | JN859276 | <i>Juniperus communis</i>      | Fülöpháza        | Spring |
| REF057 | DSE-2 | JN859277 | <i>Juniperus communis</i>      | Fülöpháza        | Summer |
| REF058 | DSE-2 | JN859278 | <i>Juniperus communis</i>      | Tatárszentgyörgy | Summer |
| REF059 | DSE-2 | JN859279 | <i>Juniperus communis</i>      | Fülöpháza        | Summer |
| REF060 | DSE-2 | JN859280 | <i>Juniperus communis</i>      | Fülöpháza        | Fall   |
| REF061 | DSE-2 | JN859281 | <i>Festuca procumbens</i>      | Fülöpháza        | Summer |
| REF062 | DSE-3 | JN859282 | <i>Ailanthus altissima</i>     | Fülöpháza        | Summer |
| REF063 | DSE-3 | JN859283 | <i>Ailanthus altissima</i>     | Fülöpháza        | Summer |
| REF064 | DSE-3 | JN859284 | <i>Populus alba</i>            | Fülöpháza        | Summer |
| REF065 | DSE-3 | JN859285 | <i>Asclepias syriaca</i>       | Fülöpháza        | Summer |
| REF066 | DSE-3 | JN859286 | <i>Ambrosia artemisiifolia</i> | Fülöpháza        | Summer |
| REF067 | DSE-3 | JN859287 | <i>Festuca procumbens</i>      | Fülöpháza        | Summer |
| REF068 | DSE-3 | JN859288 | <i>Ailanthus altissima</i>     | Fülöpháza        | Summer |
| REF069 | DSE-3 | JN859289 | <i>Juniperus communis</i>      | Tatárszentgyörgy | Fall   |
| REF070 | DSE-3 | JN859290 | <i>Juniperus communis</i>      | Fülöpháza        | Spring |
| REF071 | DSE-3 | JN859291 | <i>Ephedra distachya</i>       | Fülöpháza        | Fall   |
| REF072 | DSE-3 | JN859292 | <i>Ephedra distachya</i>       | Fülöpháza        | Fall   |
| REF073 | DSE-3 | JN859293 | <i>Medicago minima</i>         | Fülöpháza        | Summer |
| REF074 | DSE-3 | JN859294 | <i>Medicago minima</i>         | Fülöpháza        | Summer |
| REF075 | DSE-3 | JN859295 | <i>Medicago minima</i>         | Fülöpháza        | Summer |
| REF076 | DSE-3 | JN859296 | <i>Medicago minima</i>         | Fülöpháza        | Summer |
| REF077 | DSE-3 | JN859297 | <i>Ailanthus altissima</i>     | Tatárszentgyörgy | Summer |
| REF078 | DSE-3 | JN859298 | <i>Medicago minima</i>         | Fülöpháza        | Summer |
| REF079 | DSE-3 | JN859299 | <i>Ambrosia artemisiifolia</i> | Fülöpháza        | Summer |
| REF080 | DSE-3 | JN859300 | <i>Ailanthus altissima</i>     | Fülöpháza        | Summer |
| REF081 | DSE-3 | JN859301 | <i>Medicago minima</i>         | Fülöpháza        | Summer |
| REF082 | DSE-3 | JN859302 | <i>Medicago minima</i>         | Fülöpháza        | Summer |
| REF083 | DSE-3 | JN859303 | <i>Populus alba</i>            | Fülöpháza        | Summer |
| REF084 | DSE-3 | JN859304 | <i>Ephedra distachya</i>       | Fülöpháza        | Fall   |
| REF085 | DSE-3 | JN859305 | <i>Ailanthus altissima</i>     | Tatárszentgyörgy | Fall   |
| REF086 | DSE-3 | JN859306 | <i>Ambrosia artemisiifolia</i> | Tatárszentgyörgy | Fall   |
| REF087 | DSE-3 | JN859307 | <i>Juniperus communis</i>      | Fülöpháza        | Fall   |
| REF088 | DSE-3 | JN859308 | <i>Medicago minima</i>         | Fülöpháza        | Summer |
| REF089 | DSE-3 | JN859309 | <i>Ambrosia artemisiifolia</i> | Fülöpháza        | Summer |
| REF090 | DSE-3 | JN859310 | <i>Medicago minima</i>         | Fülöpháza        | Summer |
| REF091 | DSE-3 | JN859311 | <i>Ambrosia artemisiifolia</i> | Tatárszentgyörgy | Summer |
| REF092 | DSE-3 | JN859312 | <i>Medicago minima</i>         | Fülöpháza        | Summer |
| REF093 | DSE-3 | JN859313 | <i>Ephedra distachya</i>       | Fülöpháza        | Fall   |
| REF094 | DSE-3 | JN859314 | <i>Ephedra distachya</i>       | Fülöpháza        | Fall   |
| REF095 | DSE-3 | JN859315 | <i>Ailanthus altissima</i>     | Tatárszentgyörgy | Summer |
| REF096 | DSE-3 | JN859316 | <i>Juniperus communis</i>      | Fülöpháza        | Spring |
| REF097 | DSE-3 | JN859317 | <i>Ailanthus altissima</i>     | Tatárszentgyörgy | Summer |
| REF098 | DSE-3 | JN859318 | <i>Ambrosia artemisiifolia</i> | Tatárszentgyörgy | Summer |
| REF099 | DSE-4 | JN859319 | <i>Populus alba</i>            | Fülöpháza        | Summer |
| REF100 | DSE-4 | JN859320 | <i>Populus alba</i>            | Fülöpháza        | Summer |
| REF101 | DSE-4 | JN859321 | <i>Populus alba</i>            | Fülöpháza        | Summer |
| REF102 | 6     | JN859322 | <i>Juniperus communis</i>      | Bugac            | Summer |
| REF103 | 6     | JN859323 | <i>Juniperus communis</i>      | Bugac            | Summer |
| REF104 | DSE-5 | JN859324 | <i>Ambrosia artemisiifolia</i> | Tatárszentgyörgy | Fall   |
| REF105 | DSE-5 | JN859325 | <i>Ambrosia artemisiifolia</i> | Tatárszentgyörgy | Fall   |
| REF106 | DSE-6 | JN859326 | <i>Ephedra distachya</i>       | Fülöpháza        | Fall   |

|        |        |          |                            |                  |        |
|--------|--------|----------|----------------------------|------------------|--------|
| REF107 | DSE-6  | JN859327 | <i>Medicago minima</i>     | Fülöpháza        | Summer |
| REF108 | DSE-6  | JN859328 | <i>Ephedra distachya</i>   | Fülöpháza        | Fall   |
| REF109 | DSE-6  | JN859329 | <i>Medicago minima</i>     | Fülöpháza        | Summer |
| REF110 | DSE-6  | JN859330 | <i>Ailanthus altissima</i> | Fülöpháza        | Summer |
| REF111 | 7      | JN859331 | <i>Ailanthus altissima</i> | Tatárszentgyörgy | Summer |
| REF112 | 8      | JN859332 | <i>Populus alba</i>        | Fülöpháza        | Summer |
| REF113 | 9      | JN859333 | <i>Juniperus communis</i>  | Tatárszentgyörgy | Summer |
| REF114 | 9      | JN859334 | <i>Ailanthus altissima</i> | Fülöpháza        | Summer |
| REF115 | 9      | JN859335 | <i>Juniperus communis</i>  | Tatárszentgyörgy | Spring |
| REF116 | 9      | JN859336 | <i>Juniperus communis</i>  | Fülöpháza        | Spring |
| REF117 | 9      | JN859337 | <i>Juniperus communis</i>  | Fülöpháza        | Spring |
| REF118 | 10     | JN859338 | <i>Helianthemum ovatum</i> | Fülöpháza        | Spring |
| REF119 | 10     | JN859339 | <i>Helianthemum ovatum</i> | Fülöpháza        | Spring |
| REF120 | 10     | JN859340 | <i>Festuca procumbens</i>  | Fülöpháza        | Spring |
| REF121 | 10     | JN859341 | <i>Festuca procumbens</i>  | Fülöpháza        | Spring |
| REF122 | 10     | JN859342 | <i>Festuca procumbens</i>  | Fülöpháza        | Spring |
| REF123 | DSE-7  | JN859343 | <i>Festuca vaginata</i>    | Fülöpháza        | Summer |
| REF124 | DSE-7  | JN859344 | <i>Festuca vaginata</i>    | Fülöpháza        | Summer |
| REF125 | DSE-7  | JN859345 | <i>Festuca vaginata</i>    | Fülöpháza        | Summer |
| REF126 | DSE-7  | JN859346 | <i>Festuca vaginata</i>    | Fülöpháza        | Summer |
| REF127 | DSE-7  | JN859347 | <i>Festuca vaginata</i>    | Fülöpháza        | Summer |
| REF128 | DSE-7  | JN859348 | <i>Festuca vaginata</i>    | Fülöpháza        | Summer |
| REF129 | DSE-7  | JN859349 | <i>Festuca vaginata</i>    | Fülöpháza        | Summer |
| REF130 | DSE-7  | JN859350 | <i>Festuca procumbens</i>  | Fülöpháza        | Summer |
| REF131 | DSE-7  | JN859351 | <i>Festuca vaginata</i>    | Fülöpháza        | Summer |
| REF132 | DSE-7  | JN859352 | <i>Ailanthus altissima</i> | Tatárszentgyörgy | Summer |
| REF133 | DSE-7  | JN859353 | <i>Festuca vaginata</i>    | Fülöpháza        | Summer |
| REF134 | DSE-7  | JN859354 | <i>Festuca vaginata</i>    | Fülöpháza        | Summer |
| REF135 | DSE-7  | JN859355 | <i>Stipa borysthénica</i>  | Fülöpháza        | Spring |
| REF136 | DSE-7  | JN859356 | <i>Festuca vaginata</i>    | Fülöpháza        | Summer |
| REF137 | DSE-7  | JN859357 | <i>Stipa borysthénica</i>  | Fülöpháza        | Spring |
| REF138 | DSE-7  | JN859358 | <i>Festuca vaginata</i>    | Fülöpháza        | Summer |
| REF139 | DSE-7  | JN859359 | <i>Festuca vaginata</i>    | Fülöpháza        | Summer |
| REF140 | DSE-7  | JN859360 | <i>Stipa borysthénica</i>  | Fülöpháza        | Spring |
| REF141 | 11     | JN859361 | <i>Festuca vaginata</i>    | Fülöpháza        | Summer |
| REF142 | 12     | JN859362 | <i>Juniperus communis</i>  | Bugac            | Fall   |
| REF143 | DSE-8  | JN859363 | <i>Festuca vaginata</i>    | Fülöpháza        | Summer |
| REF144 | DSE-8  | JN859364 | <i>Festuca vaginata</i>    | Fülöpháza        | Summer |
| REF145 | DSE-8  | JN859365 | <i>Festuca vaginata</i>    | Fülöpháza        | Summer |
| REF146 | DSE-9  | JN859366 | <i>Medicago minima</i>     | Fülöpháza        | Summer |
| REF147 | DSE-9  | JN859367 | <i>Festuca procumbens</i>  | Fülöpháza        | Summer |
| REF148 | DSE-9  | JN859368 | <i>Medicago minima</i>     | Fülöpháza        | Summer |
| REF149 | DSE-9  | JN859369 | <i>Festuca procumbens</i>  | Fülöpháza        | Summer |
| REF150 | DSE-9  | JN859370 | <i>Festuca vaginata</i>    | Fülöpháza        | Summer |
| REF151 | DSE-9  | JN859371 | <i>Festuca vaginata</i>    | Fülöpháza        | Summer |
| REF152 | DSE-9  | JN859372 | <i>Festuca vaginata</i>    | Fülöpháza        | Summer |
| REF153 | DSE-9  | JN859373 | <i>Festuca vaginata</i>    | Fülöpháza        | Summer |
| REF154 | DSE-10 | JN859374 | <i>Ailanthus altissima</i> | Tatárszentgyörgy | Summer |
| REF155 | DSE-10 | JN859375 | <i>Ailanthus altissima</i> | Fülöpháza        | Summer |
| REF156 | DSE-10 | JN859376 | <i>Juniperus communis</i>  | Tatárszentgyörgy | Summer |
| REF157 | 13     | JN859377 | <i>Festuca procumbens</i>  | Fülöpháza        | Summer |
| REF158 | DSE-11 | JN859378 | <i>Ailanthus altissima</i> | Tatárszentgyörgy | Fall   |
| REF159 | 14     | JN859379 | <i>Ailanthus altissima</i> | Fülöpháza        | Summer |
| REF160 | 14     | JN859380 | <i>Juniperus communis</i>  | Fülöpháza        | Summer |
| REF161 | 14     | JN859381 | <i>Juniperus communis</i>  | Bugac            | Fall   |
| REF162 | 14     | JN859382 | <i>Juniperus communis</i>  | Bugac            | Spring |

|        |        |          |                                |                  |        |
|--------|--------|----------|--------------------------------|------------------|--------|
| REF163 | 15     | JN859383 | <i>Ailanthus altissima</i>     | Fülöpháza        | Summer |
| REF164 | 16     | JN859384 | <i>Ailanthus altissima</i>     | Tatárszentgyörgy | Summer |
| REF165 | DSE-12 | JN859385 | <i>Ailanthus altissima</i>     | Fülöpháza        | Summer |
| REF166 | DSE-13 | JN859386 | <i>Ailanthus altissima</i>     | Tatárszentgyörgy | Summer |
| REF167 | DSE-13 | JN859387 | <i>Ailanthus altissima</i>     | Tatárszentgyörgy | Fall   |
| REF168 | DSE-13 | JN859388 | <i>Asclepias syriaca</i>       | Fülöpháza        | Summer |
| REF169 | 17     | JN859389 | <i>Juniperus communis</i>      | Fülöpháza        | Spring |
| REF170 | 18     | JN859390 | <i>Juniperus communis</i>      | Bugac            | Spring |
| REF171 | 19     | JN859391 | <i>Ailanthus altissima</i>     | Fülöpháza        | Summer |
| REF172 | 20     | JN859392 | <i>Ambrosia artemisiifolia</i> | Tatárszentgyörgy | Fall   |
| REF173 | 21     | JN859393 | <i>Asclepias syriaca</i>       | Fülöpháza        | Summer |
| REF174 | 22     | JN859394 | <i>Ailanthus altissima</i>     | Tatárszentgyörgy | Summer |
| REF175 | 23     | JN859395 | <i>Ailanthus altissima</i>     | Tatárszentgyörgy | Fall   |
| REF176 | 24     | JN859396 | <i>Juniperus communis</i>      | Tatárszentgyörgy | Spring |
| REF177 | 25     | JN859397 | <i>Juniperus communis</i>      | Tatárszentgyörgy | Summer |
| REF178 | 25     | JN859398 | <i>Juniperus communis</i>      | Tatárszentgyörgy | Summer |
| REF179 | 25     | JN859399 | <i>Juniperus communis</i>      | Tatárszentgyörgy | Summer |
| REF180 | 25     | JN859400 | <i>Juniperus communis</i>      | Tatárszentgyörgy | Summer |
| REF181 | 25     | JN859401 | <i>Ephedra distachya</i>       | Fülöpháza        | Fall   |
| REF182 | 25     | JN859402 | <i>Juniperus communis</i>      | Tatárszentgyörgy | Fall   |
| REF183 | 25     | JN859403 | <i>Juniperus communis</i>      | Bugac            | Fall   |
| REF184 | 25     | JN859404 | <i>Juniperus communis</i>      | Tatárszentgyörgy | Fall   |
| REF185 | 25     | JN859405 | <i>Juniperus communis</i>      | Bugac            | Fall   |
| REF186 | 25     | JN859406 | <i>Juniperus communis</i>      | Bugac            | Fall   |
| REF187 | 25     | JN859407 | <i>Juniperus communis</i>      | Bugac            | Fall   |
| REF188 | 25     | JN859408 | <i>Ailanthus altissima</i>     | Tatárszentgyörgy | Fall   |
| REF189 | 25     | JN859409 | <i>Juniperus communis</i>      | Fülöpháza        | Fall   |
| REF190 | 25     | JN859410 | <i>Ailanthus altissima</i>     | Tatárszentgyörgy | Fall   |
| REF191 | 25     | JN859411 | <i>Juniperus communis</i>      | Bugac            | Summer |
| REF192 | 25     | JN859412 | <i>Juniperus communis</i>      | Bugac            | Summer |
| REF193 | 25     | JN859413 | <i>Juniperus communis</i>      | Bugac            | Summer |
| REF194 | 25     | JN859414 | <i>Juniperus communis</i>      | Bugac            | Summer |
| REF195 | 25     | JN859415 | <i>Asclepias syriaca</i>       | Fülöpháza        | Summer |
| REF196 | 25     | JN859416 | <i>Asclepias syriaca</i>       | Fülöpháza        | Summer |
| REF197 | 25     | JN859417 | <i>Juniperus communis</i>      | Bugac            | Spring |
| REF198 | 25     | JN859418 | <i>Juniperus communis</i>      | Tatárszentgyörgy | Spring |
| REF199 | 25     | JN859419 | <i>Juniperus communis</i>      | Fülöpháza        | Spring |
| REF200 | 25     | JN859420 | <i>Juniperus communis</i>      | Bugac            | Spring |
| REF201 | 25     | JN859421 | <i>Juniperus communis</i>      | Tatárszentgyörgy | Spring |
| REF202 | 25     | JN859422 | <i>Juniperus communis</i>      | Bugac            | Spring |
| REF203 | 26     | JN859423 | <i>Populus alba</i>            | Fülöpháza        | Summer |
| REF204 | 26     | JN859424 | <i>Ailanthus altissima</i>     | Tatárszentgyörgy | Summer |
| REF205 | 26     | JN859425 | <i>Juniperus communis</i>      | Tatárszentgyörgy | Fall   |
| REF206 | 26     | JN859426 | <i>Ailanthus altissima</i>     | Fülöpháza        | Summer |
| REF207 | 26     | JN859427 | <i>Ailanthus altissima</i>     | Fülöpháza        | Summer |
| REF208 | 26     | JN859428 | <i>Medicago minima</i>         | Fülöpháza        | Summer |
| REF209 | DSE-14 | JN859429 | <i>Ailanthus altissima</i>     | Tatárszentgyörgy | Fall   |
| REF210 | DSE-14 | JN859430 | <i>Ailanthus altissima</i>     | Tatárszentgyörgy | Fall   |
| REF211 | DSE-14 | JN859431 | <i>Ailanthus altissima</i>     | Fülöpháza        | Summer |
| REF212 | 27     | JN859432 | <i>Populus alba</i>            | Fülöpháza        | Summer |
| REF213 | 27     | JN859433 | <i>Ephedra distachya</i>       | Fülöpháza        | Fall   |
| REF214 | 27     | JN859434 | <i>Ailanthus altissima</i>     | Tatárszentgyörgy | Fall   |
| REF215 | 27     | JN859435 | <i>Medicago minima</i>         | Fülöpháza        | Summer |
| REF216 | 27     | JN859436 | <i>Medicago minima</i>         | Fülöpháza        | Summer |
| REF217 | 27     | JN859437 | <i>Medicago minima</i>         | Fülöpháza        | Summer |
| REF218 | 27     | JN859438 | <i>Medicago minima</i>         | Fülöpháza        | Summer |

|        |    |          |                            |                  |        |
|--------|----|----------|----------------------------|------------------|--------|
| REF219 | 27 | JN859439 | <i>Juniperus communis</i>  | Tatárszentgyörgy | Summer |
| REF220 | 27 | JN859440 | <i>Juniperus communis</i>  | Tatárszentgyörgy | Spring |
| REF221 | 27 | JN859441 | <i>Helianthemum ovatum</i> | Fülöpháza        | Summer |
| REF222 | 27 | JN859442 | <i>Ailanthus altissima</i> | Fülöpháza        | Summer |
| REF223 | 27 | JN859443 | <i>Ephedra distachya</i>   | Fülöpháza        | Fall   |
| REF224 | 27 | JN859444 | <i>Ailanthus altissima</i> | Fülöpháza        | Summer |
| REF225 | 27 | JN859445 | <i>Asclepias syriaca</i>   | Fülöpháza        | Summer |
| REF226 | 27 | JN859446 | <i>Ailanthus altissima</i> | Fülöpháza        | Summer |
| REF227 | 27 | JN859447 | <i>Ailanthus altissima</i> | Fülöpháza        | Summer |
| REF228 | 27 | JN859448 | <i>Ailanthus altissima</i> | Fülöpháza        | Summer |
| REF229 | 27 | JN859449 | <i>Juniperus communis</i>  | Tatárszentgyörgy | Summer |
| REF230 | 27 | JN859450 | <i>Juniperus communis</i>  | Bugac            | Summer |
| REF231 | 27 | JN859451 | <i>Juniperus communis</i>  | Bugac            | Summer |
| REF232 | 27 | JN859452 | <i>Juniperus communis</i>  | Bugac            | Fall   |
| REF233 | 27 | JN859453 | <i>Juniperus communis</i>  | Bugac            | Fall   |
| REF234 | 27 | JN859454 | <i>Juniperus communis</i>  | Bugac            | Fall   |
| REF235 | 27 | JN859455 | <i>Helianthemum ovatum</i> | Fülöpháza        | Summer |
| REF236 | 27 | JN859456 | <i>Populus alba</i>        | Fülöpháza        | Summer |
| REF237 | 27 | JN859457 | <i>Juniperus communis</i>  | Fülöpháza        | Summer |
| REF238 | 27 | JN859458 | <i>Juniperus communis</i>  | Tatárszentgyörgy | Summer |
| REF239 | 27 | JN859459 | <i>Ailanthus altissima</i> | Tatárszentgyörgy | Fall   |
| REF240 | 27 | JN859460 | <i>Medicago minima</i>     | Fülöpháza        | Summer |
| REF241 | 27 | JN859461 | <i>Juniperus communis</i>  | Bugac            | Summer |

---
