# Supplementary material for: The Dark Side Is Not Fastidious – Dark Septate Endophytic Fungi of Native and Invasive Plants of Semiarid Sandy Areas
Source: PubMed Central journal article supplement (PMC3290574; doi:10.1371/journal.pone.0032570), 2012-02-29
Supplement: pone.0032570.s007.pdf [file pone.0032570.s007.pdf]

**Table S2** Closest BLAST matches of representative isolates of DSE groups

| DSE group                                                       | Isolate                                               | Closest sequence matches                                         | Source / Host                                                          | Country                                                                                  | Coverage                                                       | Similarity |     |    |
|-----------------------------------------------------------------|-------------------------------------------------------|------------------------------------------------------------------|------------------------------------------------------------------------|------------------------------------------------------------------------------------------|----------------------------------------------------------------|------------|-----|----|
| 1                                                               | REF025                                                | u. mycorrhizal ascomycete (AY634148)                             | H: <i>Epipactis atrorubens</i> , TT: mycorrhizal root section, ES      | Germany                                                                                  | 100                                                            | 99         |     |    |
|                                                                 |                                                       | <i>Cadophora</i> sp. (FJ666349)                                  | H: <i>Populus tremuloides</i>                                          | Canada                                                                                   | 99                                                             | 98         |     |    |
|                                                                 |                                                       | <i>Cadophora</i> sp. (GU212389)                                  | IS: box packing material sample                                        | Antarctica                                                                               | 100                                                            | 97         |     |    |
|                                                                 |                                                       | <i>Cadophora</i> sp. (DQ317329)                                  | IS: Ross Sea region of Antarctica                                      | Antarctica                                                                               | 100                                                            | 97         |     |    |
|                                                                 |                                                       | <i>Cadophora luteo-olivacea</i> is. (FJ486274)                   |                                                                        |                                                                                          | 100                                                            | 97         |     |    |
|                                                                 |                                                       | u. <i>Cadophora</i> c. (EU517022)                                | IS: soil, ES                                                           | Austria                                                                                  | 97                                                             | 98         |     |    |
|                                                                 |                                                       | <i>Cadophora luteo-olivacea</i> st. (DQ404348)                   | IS: <i>Actinidia deliciosa</i> discolored wood                         | Italy                                                                                    | 100                                                            | 96         |     |    |
|                                                                 |                                                       | <i>Cadophora luteo-olivacea</i> st. (GU128589)                   | IS: apple fruit                                                        | Italy                                                                                    | 100                                                            | 96         |     |    |
|                                                                 |                                                       | <i>Cadophora luteo-olivacea</i> is. (GQ214536)                   |                                                                        |                                                                                          | 100                                                            | 96         |     |    |
|                                                                 |                                                       | <i>Cadophora luteo-olivacea</i> st. (FJ430742)                   | IS: soil                                                               | Czech Rep.                                                                               | 100                                                            | 96         |     |    |
|                                                                 |                                                       | u. ascomycete is. (AY833035)                                     | H: <i>Cephalanthera damasonium</i> , IS: orchid mycorrhiza, ES         | France                                                                                   | 96                                                             | 97         |     |    |
|                                                                 |                                                       | REF039                                                           | u. soil fungus c. (EU490132)                                           | IS: savanna soil (0 to 10 cm) under <i>Prosopis glandulosa</i> , ES                      | USA: TX                                                        | 98         | 97  |    |
|                                                                 |                                                       |                                                                  | <i>Cadophora luteo-olivacea</i> (HM116748)                             | H: <i>Actinidia deliciosa</i> cv. Hayward                                                | New Zealand                                                    | 98         | 96  |    |
|                                                                 |                                                       |                                                                  | <i>Cadophora luteo-olivacea</i> st. (DQ404349)                         |                                                                                          |                                                                | 97         | 97  |    |
|                                                                 |                                                       |                                                                  | <i>Rhexocercosporidium</i> sp. (DQ275614)                              | H: <i>Panax ginseng</i>                                                                  | Canada                                                         | 97         | 96  |    |
|                                                                 | u. soil fungus c. (DQ420925)                          |                                                                  | IS: soil, ES                                                           | USA: MN                                                                                  | 97                                                             | 96         |     |    |
|                                                                 | u. <i>Leptodontidium</i> is. (FJ378720)               |                                                                  | H: <i>Kobresia</i> sp., ES                                             | China                                                                                    | 97                                                             | 96         |     |    |
|                                                                 | dark septate endophyte (AF168783)                     |                                                                  | H: <i>Ranunculus adoneus</i>                                           | USA: CO                                                                                  | 99                                                             | 95         |     |    |
|                                                                 | u. ascomycete is. (DQ182423)                          |                                                                  | IS: host roots, H: <i>Cephalanthera longifolia</i> , ES                |                                                                                          | 97                                                             | 96         |     |    |
|                                                                 | <i>Leptodontidium orchidicola</i> st. (AF486133)      |                                                                  | H: <i>Platanthera hyperborea</i>                                       |                                                                                          | 97                                                             | 96         |     |    |
|                                                                 | 2                                                     |                                                                  | REF058                                                                 | u. fungus c. (GQ921746)                                                                  | IS: soil, ES                                                   | Australia  | 100 | 99 |
|                                                                 |                                                       | u. Helotiales c. (FJ197867)                                      |                                                                        | IS: primary successional glacier foreland soil, ES                                       | Austria                                                        | 95         | 99  |    |
|                                                                 |                                                       | u. fungus c. (EU292653)                                          |                                                                        | IS: soil, ES                                                                             | USA: AK                                                        | 100        | 97  |    |
|                                                                 |                                                       | u. Helotiales c. (GU327458)                                      |                                                                        | H: <i>Epipactis helleborine</i> , IS: mycorrhizal seedling, ES                           | Czech Rep.                                                     | 92         | 99  |    |
|                                                                 |                                                       | u. soil fungus (GU083256)                                        |                                                                        | IS: total community (raw soil DNA extraction), ES                                        | USA: AK                                                        | 100        | 97  |    |
|                                                                 |                                                       | u. fungus c. (FJ553784)                                          |                                                                        | IS: forest soil, ES                                                                      | Canada                                                         | 100        | 96  |    |
|                                                                 |                                                       | u. Helotiales is. (DQ182427)                                     |                                                                        | H: <i>Cephalanthera longifolia</i> , IS: host roots, ES                                  |                                                                | 100        | 96  |    |
|                                                                 |                                                       | Ericoid mycorrhizal sp. (AY046400)                               |                                                                        | IS: <i>Quercus ilex</i> areas                                                            | Italy                                                          | 99         | 96  |    |
|                                                                 |                                                       | u. Ascomycota c. (FJ440888)                                      |                                                                        | IS: roots of <i>Pyrola</i> plants, ES                                                    | USA: OR/CA                                                     | 100        | 96  |    |
|                                                                 |                                                       | u. ectomycorrhiza (Helotiales) is. (EF644169)                    |                                                                        | IS: ectomycorrhizal root tips of <i>Populus tremula</i> , TT: ectomycorrhizal mantle, ES | Austria                                                        | 97         | 96  |    |
|                                                                 |                                                       | u. ectomycorrhiza ( <i>Leohumicola verrucosa</i> ) c. (DQ497978) | H: <i>Tsuga heterophylla</i> , IS: root, ES                            | Canada                                                                                   | 100                                                            | 94         |     |    |
|                                                                 |                                                       | <i>Leohumicola minima</i> st. (AY706329)                         | IS: volcanic ash soil                                                  | Chile                                                                                    | 98                                                             | 94         |     |    |
|                                                                 |                                                       | Fungal endophyte sp. (EU686206)                                  | H: <i>Scapania</i> sp.                                                 | Wales                                                                                    | 100                                                            | 94         |     |    |
|                                                                 |                                                       | 3                                                                | REF078                                                                 | Fungal endophyte (AF373055)                                                              | H: <i>Rosmarinus officinalis</i> , IS: endomycorrhizae of host | Italy      | 100 | 99 |
|                                                                 |                                                       |                                                                  |                                                                        | Fungal endophyte (AF373052)                                                              | H: <i>Pinus halepensis</i> , IS: from ectomycorrhizae of host  | Italy      | 100 | 99 |
| u. endophytic fungus (AJ879648)                                 |                                                       |                                                                  |                                                                        | IS: root tips, TT: ectomycorrhiza, ES                                                    | Italy                                                          | 100        | 99  |    |
| u. endophytic fungus c. (FJ524327)                              |                                                       |                                                                  |                                                                        | IS: <i>Oryza granulate</i> root endophyte, ES                                            | China                                                          | 100        | 99  |    |
| <i>Rhizopycnis vagum</i> is. (HQ610506)                         |                                                       |                                                                  |                                                                        | IS: diseased roots collected from farm fields, H: <i>Citrullus lanatus</i>               | USA: IN                                                        | 100        | 99  |    |
| Ascomyceta sp. (HM208718)                                       |                                                       |                                                                  |                                                                        | IS: hair root, H: <i>Rhododendron fortunei</i>                                           | China                                                          | 100        | 99  |    |
| Ascomycete sp. (AM944359)                                       |                                                       |                                                                  |                                                                        | IS: <i>Lycopersicon esculentum</i> disinfected roots                                     | Colombia                                                       | 100        | 99  |    |
| Fungal endophyte sp. (DQ459005)                                 | H: <i>Dioscorea zingiberensis</i> rhizomes            |                                                                  |                                                                        | China                                                                                    | 100                                                            | 99         |     |    |
| Fungal sp. (HM208743)                                           | IS: hair root, H: <i>Rhododendron fortunei</i>        |                                                                  |                                                                        | China                                                                                    | 100                                                            | 98         |     |    |
| <i>Rhizopycnis vagum</i> (AF022786) Holotype culture (TX951120) | IS: <i>Cucumis melo</i> var. <i>cantalupensis</i>     |                                                                  |                                                                        | USA: TX                                                                                  | 100                                                            | 98         |     |    |
| <i>Rhizopycnis</i> sp. (DQ682600)                               | H: <i>Coffea arabica</i> roots                        |                                                                  | 97                                                                     | 99                                                                                       |                                                                |            |     |    |
| Fungal endophyte sp. (EU250374)                                 | IS: fruit of host, H: <i>Camptotheca acuminata</i>    |                                                                  | 100                                                                    | 95                                                                                       |                                                                |            |     |    |
| Pleosporales sp. (EU002891)                                     | IS: peduncle endophyte, H: <i>Coffea arabica</i> , ES | USA: HI                                                          | 100                                                                    | 95                                                                                       |                                                                |            |     |    |
| Fungal endophyte sp. (EU625406)                                 | IS: mulberry roots                                    |                                                                  | 96                                                                     | 98                                                                                       |                                                                |            |     |    |
| <i>Rhizopycnis</i> sp. (FJ827623)                               | IS: <i>Coffea arabica</i> endophyte                   | Ethiopia                                                         | 93                                                                     | 99                                                                                       |                                                                |            |     |    |
| Ascomycete sp. (EF672295)                                       | H: <i>Coffea arabica</i> roots                        | USA                                                              | 92                                                                     | 99                                                                                       |                                                                |            |     |    |
| Pleosporales sp. (FJ624263)                                     | H: mangrove                                           |                                                                  | 95                                                                     | 94                                                                                       |                                                                |            |     |    |
| <i>Rhizopycnis vagum</i> st. (FJ582640)                         |                                                       |                                                                  | 100                                                                    | 93                                                                                       |                                                                |            |     |    |
| 4                                                               | REF101                                                | <i>Pithomyces valparadisiacus</i> (EU552152)                     | H: <i>Protea lepidocarpodendron</i>                                    | South Africa                                                                             | 60                                                             | 85         |     |    |
|                                                                 |                                                       | u. fungus c. (GQ921741)                                          | IS: soil, ES                                                           | Australia                                                                                | 42                                                             | 100        |     |    |
|                                                                 |                                                       | u. fungus is. (GU564990)                                         | H: <i>Populus tremula</i> , ES                                         | Sweden                                                                                   | 32                                                             | 88         |     |    |
|                                                                 |                                                       | <i>Coniothyrium</i> sp. (GU062312)                               | H: <i>Alnus incana</i> , IS: wood                                      | Latvia                                                                                   | 43                                                             | 100        |     |    |
|                                                                 |                                                       | u. fungus (FN397425)                                             | IS: <i>T. melanosporum</i> truffle-ground soil, outside burnt area, ES | France                                                                                   | 43                                                             | 100        |     |    |
|                                                                 |                                                       | u. Ascomycota c. (FJ553168)                                      | IS: forest soil, ES                                                    | Canada                                                                                   | 35                                                             | 100        |     |    |
|                                                                 |                                                       | <i>Coniothyrium fuckelii</i> is. (FJ228185)                      | H: <i>Fraxinus excelsior</i>                                           | Sweden                                                                                   | 43                                                             | 100        |     |    |
|                                                                 |                                                       | Ascomycete sp. (AJ972833)                                        | IS: Marble Monument                                                    | Turkey                                                                                   | 39                                                             | 84         |     |    |
|                                                                 |                                                       | Fungal endophyte (FN394698)                                      | H: <i>Holcus lanatus</i>                                               | Spain                                                                                    | 27                                                             | 93         |     |    |
|                                                                 |                                                       | u. ascomycete c. (EU490122)                                      | IS: savanna soil (0 to 10 cm) under <i>Prosopis glandulosa</i> , ES    | USA                                                                                      | 42                                                             | 100        |     |    |
|                                                                 |                                                       | <i>Saccharicola</i> sp. (GU973718)                               | IS: root-endophyte, H: sugarcane cultivar IMI-1                        | Brazil                                                                                   | 42                                                             | 100        |     |    |
|                                                                 |                                                       | <i>Coniothyrium fuckelii</i> (AY904055)                          | H: <i>Rosa</i> sp., TT: stem                                           | Mexico                                                                                   | 42                                                             | 100        |     |    |
|                                                                 |                                                       | u. fungus (AM260897)                                             | IS: peat, ES                                                           | UK                                                                                       | 43                                                             | 100        |     |    |
|                                                                 |                                                       | 5                                                                | REF104                                                                 | <i>Alternaria helianthi</i> st. (DQ156343)                                               |                                                                | India      | 100 | 90 |
|                                                                 |                                                       |                                                                  |                                                                        | <i>Alternaria helianthi</i> (AY154713)                                                   | H: <i>Helianthus annuus</i> (leaves)                           | Iran       | 100 | 90 |
| <i>Alternaria leucanthemi</i> st. (AF314586)                    |                                                       |                                                                  |                                                                        |                                                                                          | 100                                                            | 90         |     |    |
| <i>Alternaria leucanthemi</i> st. (AY372684)                    |                                                       |                                                                  |                                                                        | China                                                                                    | 99                                                             | 90         |     |    |
| <i>Alternaria helianthi</i> is. (HM449994)                      | IS: seeds, H: <i>Helianthus annuus</i> cv. Bhanu      |                                                                  |                                                                        | India                                                                                    | 90                                                             | 91         |     |    |

|    |        |                                                 |                                                                     |            |     |     |
|----|--------|-------------------------------------------------|---------------------------------------------------------------------|------------|-----|-----|
|    |        | u. fungus c. (EU516993)                         | IS: soil, ES                                                        | Austria    | 88  | 89  |
|    |        | <i>Leptosphaeria lindquistii</i> is. (HM003206) | H: <i>Helianthus annuus</i> , TT: mycelium                          | China      | 87  | 89  |
|    |        | u. fungus c. (FJ237205)                         | IS: in-growth mesh bags in snow covered alpine soil, ES             | Austria    | 93  | 88  |
|    |        | <i>Leptosphaeria maculans</i> (M96663)          |                                                                     |            | 91  | 87  |
|    |        | u. fungus c. (GU817175)                         | H: <i>Bistorta vivipara</i> individual 3.1, IS: root system         | Norway     | 93  | 87  |
|    |        | <i>Leptosphaeria</i> sp. (DQ093683)             | IS: <i>Pinus sylvestris</i> decayed roots, ES                       | Lithuania  | 96  | 86  |
| 6  | REF106 | u. ascomycete c. (EF154351)                     | H: <i>Fagopyrum esculentum</i> roots, ES                            |            | 100 | 100 |
|    |        | u. Ascomycota c. (HM162252)                     | IS: grass roots, ES                                                 | USA: TX    | 100 | 99  |
|    |        | u. ascomycete c. (EU358787)                     | H: <i>Capsicum annuum</i> , ES                                      | Mexico     | 100 | 99  |
|    |        | u. ascomycete c. (EU177123)                     | H: <i>Capsicum annuum</i> , IS: roots                               | Mexico     | 100 | 99  |
|    |        | u. soil fungus c. (EU490117)                    | IS: savanna soil (0 to 10 cm) under <i>Prosopis glandulosa</i> , ES | USA TX     | 100 | 99  |
|    |        | <i>Alternaria</i> sp. (HQ630996)                | H: <i>Miscanthus giganteus</i>                                      | USA: IL    | 100 | 98  |
|    |        | <i>Thielaviopsis basicola</i> is. (GQ131878)    | IS: peach rootstock, TT: mycelia                                    | Italy      | 94  | 99  |
|    |        | <i>Alternaria longissima</i> is. (DQ865104)     | H: <i>Linaria hegelmaieri</i>                                       | Spain      | 95  | 99  |
|    | REF109 | <i>Setophoma sacchari</i> (FN394730)            | H: <i>Holcus lanatus</i>                                            | Spain      | 100 | 100 |
|    |        | Hypocreales sp. (GQ923970)                      | IS: Ojuelos, H: <i>Bouteloua gracilis</i>                           | Mexico     | 100 | 99  |
|    |        | u. endophytic fungus c. (EF505610)              | H: <i>Zea mays</i> , IS: leaves, stems, kernels, ES                 | USA        | 100 | 99  |
|    |        | Ascomycete sp. (EF672299)                       | H: <i>Coffea arabica</i>                                            | Colombia   | 99  | 99  |
|    |        | <i>Setophoma sacchari</i> (AB499793)            | H: <i>Allium fistulosum</i>                                         | Japan      | 98  | 99  |
|    |        | Fungal endophyte st. (FJ450016)                 |                                                                     |            | 100 | 99  |
| 7  | REF123 | u. soil fungus c. (EU480270)                    | IS: biological soil crust, ES                                       | USA: NM    | 100 | 97  |
|    |        | u. root-associated fungus c. (EU144602)         | IS: roots, H: <i>Bouteloua gracilis</i> , ES                        | USA: NM    | 100 | 97  |
|    |        | Root-associated fungal sp. (EU144366)           | IS: roots, H: <i>Bouteloua gracilis</i> , ES                        | USA: NM    | 100 | 96  |
|    |        | u. root-associated fungus c. (FJ449545)         | IS: roots, H: <i>Bouteloua gracilis</i> , ES                        | USA: NM    | 96  | 96  |
|    | REF128 | u. soil fungus c. (EU480184)                    | IS: biological soil crust, ES                                       | USA: NM    | 99  | 97  |
|    |        | u. root-associated fungus c. (EU144953)         | IS: roots, H: <i>Bouteloua gracilis</i> , ES                        | USA: NM    | 99  | 97  |
|    |        | Pleosporales sp. (GQ923954)                     | IS: grasslands, H: <i>Bouteloua gracilis</i>                        | Canada: SK | 100 | 97  |
|    |        | u. Pleosporales c. (GQ924050)                   | IS: roots from wind cave, H: <i>Bouteloua gracilis</i>              | USA: SD    | 99  | 97  |
|    |        | Fungal sp. (FJ449549)                           | IS: roots, H: <i>Bouteloua gracilis</i> , ES                        | USA: NM    | 93  | 97  |
|    | REF130 | u. root-associated fungus c. (EU145013)         | IS: roots, H: <i>Bouteloua gracilis</i> , ES                        | USA: NM    | 100 | 97  |
|    |        | u. root-associated fungus c. (FJ361958)         | IS: roots, H: <i>Bouteloua gracilis</i> , ES                        | USA: NM    | 100 | 97  |
|    |        | Root-associated fungal sp. (EU144367)           | IS: roots, H: <i>Bouteloua gracilis</i> , ES                        | USA: NM    | 100 | 97  |
|    |        | u. soil fungus c. (EU479732)                    | IS: <i>Bouteloua gracilis</i> rhizosphere soil, ES                  | USA: NM    | 100 | 97  |
|    | REF132 | u. root-associated fungus c. (FJ361994)         | IS: roots, H: <i>Sporobolus cryptandrus</i> , ES                    | USA: NM    | 100 | 99  |
|    |        | u. soil fungus c. (EU480264)                    | IS: biological soil crust, ES                                       | USA: NM    | 100 | 99  |
|    |        | u. root-associated fungus c. (EU145010)         | IS: roots, H: <i>Bouteloua gracilis</i> , ES                        | USA: NM    | 100 | 99  |
|    |        | u. Pleosporales c. (GQ924025)                   | IS: roots from Konza, H: <i>Bouteloua gracilis</i>                  | USA: KS    | 100 | 99  |
|    |        | Pleosporales sp. (GQ923972)                     | IS: Oujelos, H: <i>Bouteloua gracilis</i>                           | Mexico     | 100 | 96  |
|    | REF140 | u. root-associated fungus c. (EU144759)         | IS: roots, H: <i>Bouteloua gracilis</i> , ES                        | USA: NM    | 98  | 99  |
|    |        | u. mycorrhizal fungus c. (AY929107)             | IS: root; semi-arid grassland, H: <i>Stipa hymenoides</i> , ES      | USA: UT    | 99  | 98  |
|    |        | u. Pleosporales c. (HQ389473)                   | IS: roots, H: <i>Sporobolus cryptandrus</i> , ES                    | USA: NM    | 96  | 99  |
|    |        | u. Pleosporales c. (GQ924053)                   | IS: roots from SNWR, H: <i>Bouteloua gracilis</i>                   | USA: NM    | 96  | 99  |
| 8  | REF144 | <i>Periconia macrospinoso</i> st. (FJ536208)    | IS: roots of C <sub>4</sub> grasses                                 | USA: KS    | 100 | 99  |
|    |        | u. Ascomycota c. (HM162309)                     | IS: grass roots, ES                                                 | USA: TX    | 100 | 99  |
|    |        | u. <i>Periconia</i> c. (GU055658)               | IS: grassland soil                                                  | Austria    | 99  | 89  |
|    |        | <i>Periconia macrospinoso</i> (AJ246159)        | IS: <i>Avena sativa</i> cv. Gerald roots                            | UK         | 95  | 100 |
|    |        | Pleosporales sp. (GQ923975)                     | IS: Ojuelos, H: <i>Bouteloua gracilis</i>                           | Mexico     | 95  | 99  |
|    |        | u. soil fungus c. (DQ420990)                    | IS: soil, ES                                                        | USA: MN    | 100 | 97  |
|    |        | <i>Periconia</i> sp. (HQ631028)                 | H: <i>Saccharum officinarum</i>                                     | USA: LA    | 100 | 97  |
|    |        | <i>Periconia macrospinoso</i> (FN393421)        | H: <i>Holcus lanatus</i> roots                                      | Spain      | 92  | 99  |
|    |        | u. fungus c. (HQ260291)                         | IS: roots, H: Ericaceae, ES                                         | USA: AK    | 100 | 97  |
|    |        | <i>Massarina</i> sp. (GQ141701)                 | IS: brown rice, H: rice                                             |            | 93  | 98  |
|    |        | <i>Periconia</i> sp. (HQ130695)                 | H: <i>Warburgia ugandensis</i>                                      |            | 96  | 97  |
|    |        | <i>Massarina igniaria</i> st. (EU715627)        | IS: branch, H: <i>Taxus globosa</i>                                 | Mexico     | 93  | 97  |
|    |        | u. fungus c. (GQ999275)                         | IS: air filter sample, ES                                           |            | 100 | 94  |
|    |        | <i>Periconia macrospinoso</i> st. (HQ328037)    |                                                                     |            | 93  | 97  |
|    |        | <i>Periconia</i> sp. (FJ903341)                 | IS: decayed wood, H: <i>Picea abies</i>                             | Latvia     | 90  | 97  |
|    |        | Fungal endophyte sp. (EU685980)                 | H: <i>Cheilelejeunea</i> sp.                                        | Peru       | 93  | 96  |
|    |        | <i>Massarina igniaria</i> st. (GQ377480)        | H: <i>Taxus globosa</i> , IS: branch                                | Mexico     | 91  | 97  |
|    |        | <i>Periconia macrospinoso</i> (AM262349)        | H: <i>Dactylis glomerata</i>                                        | Spain      | 81  | 100 |
|    |        | Fungal endophyte sp. (EU977233)                 | H: <i>Macairea thyrsiflora</i>                                      | Peru       | 88  | 97  |
| 9  | REF148 | u. soil fungus c. (EU480177)                    | IS: biological soil crust, ES                                       | USA: NM    | 100 | 100 |
|    |        | <i>Embellisia</i> sp. (AY345356)                | H: <i>Hennediella heimii</i>                                        | Antarctica | 100 | 99  |
|    |        | u. root-associated fungus c. (FJ362231)         | IS: roots, H: <i>Sporobolus cryptandrus</i> , ES                    | USA: NM    | 100 | 99  |
|    |        | <i>Embellisia astragali</i> st. (FJ914716)      |                                                                     |            | 100 | 99  |
|    |        | <i>Embellisia</i> sp. (AY864335)                | H: <i>Hennediella heimii</i>                                        | Antarctica | 100 | 99  |
|    |        | <i>Alternaria japonica</i> (AY154703)           | H: <i>Raphanus sativus</i> (leaves)                                 | Iran       | 100 | 95  |
|    | REF150 | <i>Embellisia</i> sp. (AF212309)                |                                                                     | Antarctica | 100 | 99  |
|    |        | u. soil fungus c. (EU480175)                    | IS: biological soil crust, ES                                       | USA: NM    | 100 | 99  |
|    |        | u. root-associated fungus c. (EU144461)         | IS: roots, H: <i>Bouteloua gracilis</i> , ES                        | USA: NM    | 96  | 99  |
|    |        | <i>Embellisia telluster</i> st. (FJ357316)      | H: <i>Oxytropis</i> spp.                                            | USA: NM    | 97  | 99  |
|    |        | <i>Embellisia allii</i> (AY278840)              |                                                                     |            | 96  | 99  |
|    |        | <i>Embellisia allii</i> (AB477430)              | H: <i>Allium sativum</i>                                            | China      | 92  | 98  |
|    |        | <i>Pleospora papaveracea</i> is. (DQ885386)     | H: <i>Papaver somniferum</i>                                        | Spain      | 100 | 94  |
|    |        | <i>Chalastospora gossypii</i> (FN868458)        | H: <i>Pinus halepensis</i>                                          | Spain      | 100 | 92  |
| 10 | REF154 | u. fungus (FN397304)                            | IS: <i>Tuber melanosporum</i> truffle-ground soil, burnt area, ES   | France     | 100 | 100 |

|    |        |                                                   |                                                                                                   |             |     |     |
|----|--------|---------------------------------------------------|---------------------------------------------------------------------------------------------------|-------------|-----|-----|
|    |        | <i>Curvularia inaequalis</i> (FM163616)           | IS: nasal secretion                                                                               | Italy       | 100 | 100 |
|    |        | u. Ascomycota c. (HM161938)                       | IS: grass roots, ES                                                                               | USA: TX     | 100 | 99  |
|    |        | u. endophytic fungus c. (EF505555)                | H: <i>Zea mays</i> , IS: leaves, stems, kernels, ES                                               | USA         | 99  | 100 |
|    |        | <i>Curvularia coicicola</i> (AB453880)            | IS: <i>Coicis lacryma-jobi</i> L.                                                                 | China       | 100 | 99  |
|    |        | <i>Curvularia inaequalis</i> st. (HM101095)       |                                                                                                   |             | 98  | 100 |
|    |        | <i>Curvularia inaequalis</i> st. (AF120261)       |                                                                                                   |             | 98  | 99  |
|    |        | u. ascomycete c. (EU489922)                       | IS: savanna soil (0 to 10 cm) under C4 midgrasses, ES                                             | USA         | 100 | 97  |
|    |        | <i>Curvularia inaequalis</i> (AF313409)           |                                                                                                   |             | 100 | 97  |
|    |        | u. soil fungus c. (DQ420883)                      | IS: soil, ES                                                                                      | USA: MN     | 100 | 97  |
|    |        | <i>Curvularia geniculata</i> (AB245085)           | H: <i>Agrostis strobilifera</i>                                                                   | Japan       | 99  | 97  |
|    |        | <i>Curvularia inaequalis</i> st. (AY941256)       |                                                                                                   |             | 92  | 100 |
| 11 | REF158 | <i>Microdochium bolleyi</i> (AM502264)            |                                                                                                   |             | 100 | 100 |
|    |        | <i>Microdochium bolleyi</i> st. (GU566298)        | IS: rhizosphere, H: <i>Phalaris arundinacea</i>                                                   | Czech Rep.  | 100 | 100 |
|    |        | <i>Microdochium</i> sp. (AJ279489)                | H: <i>Phragmites australis</i> roots                                                              | Germany     | 100 | 100 |
|    |        | <i>Microdochium</i> sp. (HQ630981)                | H: <i>Miscanthus giganteus</i>                                                                    | USA: IL     | 100 | 99  |
|    |        | u. fungus (FN391313)                              | IS: <i>Tuber melanosporum</i> truffle-ground soil, burnt area, ES                                 | France      | 100 | 99  |
|    |        | Xylariales sp. (EU755004)                         | IS: soil and roots of oilseed rape, ES                                                            |             | 100 | 99  |
|    |        | u. endophytic fungus c. (EF505625)                | H: <i>Zea mays</i> , IS: leaves, stems, kernels, ES                                               | USA         | 100 | 99  |
|    |        | <i>Microdochium</i> sp. (FJ439588)                | IS: soil artificially contaminated with pyrene                                                    | UK          | 98  | 100 |
|    |        | Ascomycete sp. (AY243053)                         | H: <i>Ammophila arenaria</i> , IS: plants grown in greenhouse in sterilized and unsterilized soil | USA: CA     | 96  | 99  |
|    |        | <i>Microdochium bolleyi</i> (AM924150)            | H: <i>Elymus farctus</i>                                                                          | Spain       | 92  | 100 |
|    |        | u. Xylariales c. (GQ924061)                       | H: <i>Bouteloua gracilis</i> , IS: roots from wind cave, ES                                       | USA: SD     | 92  | 99  |
|    |        | <i>Microdochium bolleyi</i> is. (HM007082)        | IS: <i>Stipa grandis</i> , IS: roots                                                              | China       | 90  | 99  |
|    |        | <i>Microdochium</i> sp. (FJ536210)                | H: roots of C <sub>4</sub> grasses                                                                | USA: KS     | 92  | 100 |
|    |        | u. Xylariales c. (DQ317371)                       | IS: Ross Sea region of Antarctica, ES                                                             | Antarctica  | 66  | 100 |
| 12 | REF165 | Fungal sp. (HM036626)                             | H: <i>Pinus sylvestris</i> , IS: root tip                                                         | Lithuania   | 83  | 99  |
|    |        | <i>Thermoascus crustaceus</i> st. (EU021597)      |                                                                                                   |             | 99  | 87  |
|    |        | <i>Byssosclamyces verrucosa</i> (DQ073329)        |                                                                                                   | Australia   | 99  | 87  |
|    |        | <i>Thermoascus crustaceus</i> (U18353)            | TT: mycelium, dev stage: hyphal                                                                   |             | 99  | 87  |
|    |        | <i>Penicillium inflatum</i> (AJ608959)            | IS: plasticised polyvinylchloride                                                                 | Bulgaria    | 99  | 87  |
|    |        | <i>Penicillium inflatum</i> st. (AF033393)        |                                                                                                   |             | 99  | 87  |
|    |        | <i>Thermoascus crustaceus</i> st. (FJ389925)      | H: <i>Parthenium argentatum</i>                                                                   | USA         | 98  | 87  |
|    |        | <i>Aspergillus wentii</i> is. (FJ537089)          |                                                                                                   |             | 95  | 88  |
|    |        | <i>Aspergillus wentii</i> is. (EF652158)          |                                                                                                   |             | 95  | 88  |
|    |        | <i>Aspergillus dimorphicus</i> (FR727119)         | IS: phylloplane                                                                                   | Czech Rep.  | 95  | 88  |
|    |        | <i>Aspergillus heteromorphus</i> (AJ876879)       | IS: culture contaminant                                                                           | Brazil      | 99  | 87  |
|    |        | <i>Talaromyces leycettanus</i> st. (AF454080)     |                                                                                                   |             | 99  | 87  |
| 13 | REF168 | u. <i>Plectosphaerella</i> c. (GU327453)          | H: <i>Epipactis helleborine</i> , IS: mycorrhizal seedling, ES                                    | Czech Rep.  | 100 | 99  |
|    |        | <i>Phyllachoraceae</i> sp. (EU755008)             | IS: soil and roots of oilseed rape, ES                                                            |             | 100 | 99  |
|    |        | u. fungus (FM875855)                              | IS: biofilter reactor, ES                                                                         |             | 100 | 99  |
|    |        | <i>Plectosphaerella</i> sp. (FJ430715)            |                                                                                                   | Czech Rep.  | 100 | 99  |
|    |        | u. ascomycete c. (AY615882)                       | IS: field rhizosphere, ES                                                                         | Netherlands | 100 | 99  |
|    |        | u. ascomycete (AM901905)                          | IS: house dust, ES                                                                                | Finland     | 98  | 99  |
|    |        | u. fungus c. (GQ921802)                           | IS: soil, ES                                                                                      | Australia   | 98  | 99  |
|    |        | <i>Plectosphaerella cucumerina</i> st. (EF495236) | IS: <i>Paris polyphylla</i> var. <i>yunnanensis</i> rhizomes                                      | China       | 100 | 99  |
|    |        | <i>Plectosphaerella</i> sp. (GQ407099)            | H: <i>Musa acuminata</i> , IS: root, N: fungal endophyte                                          | Malaysia    | 100 | 98  |
|    |        | <i>Plectosphaerella cucumerina</i> st. (DQ779781) | IS: soil                                                                                          |             | 98  | 99  |
|    |        | <i>Plectosphaerella cucumerina</i> (AJ492873)     | H: potato cyst nematode                                                                           | UK          | 100 | 98  |
|    |        | <i>Plectosphaerella cucumerina</i> (FM178318)     |                                                                                                   | Australia   | 96  | 99  |
|    |        | <i>Plectosphaerella</i> sp. (HQ008920)            | H: <i>Arrabidaea candicans</i>                                                                    | Ecuador     | 100 | 98  |
|    |        | <i>Plectosphaerella cucumerina</i> (AB469880)     | H: <i>Homo sapiens</i> cornea                                                                     |             | 100 | 98  |
|    |        | <i>Colletotrichum pisi</i> st. (EU400150)         |                                                                                                   |             | 100 | 97  |
| 14 | REF210 | <i>Fusarium</i> sp. (HQ166538)                    | H: <i>Buxus sempervirens</i> , IS: infected leaves                                                | Switzerland | 100 | 100 |
|    |        | Hypocreales sp. (GQ923966)                        | H: <i>Bouteloua gracilis</i> , IS: wind cave                                                      | USA: SD     | 100 | 100 |
|    |        | <i>Fusarium acuminatum</i> st. (HM068325)         |                                                                                                   |             | 100 | 100 |
|    |        | <i>Fusarium</i> sp. (GU480954)                    | H: wheat, IS: seeds                                                                               | Mexico      | 100 | 100 |
|    |        | <i>Fusarium</i> sp. (GQ505464)                    |                                                                                                   | USA: TX     | 100 | 100 |
|    |        | Fungal sp. (GQ866861)                             | H: <i>Spiranthes sinensis</i> (Pers.) Ames                                                        | China       | 100 | 100 |
|    |        | u. root-associated fungus c. (FJ362249)           | H: <i>Yucca glauca</i> , IS: roots, ES                                                            | USA: NM     | 100 | 100 |
|    |        | <i>Fusarium solani</i> (AB470848)                 | H: <i>Larix gmelinii</i> var. <i>principis-rupprechtii</i>                                        | China       | 100 | 100 |
|    |        | <i>Fusarium</i> sp. (EU910079)                    | H: <i>Cicer arietinum</i>                                                                         |             | 100 | 100 |
|    |        | <i>Fusarium tricinctum</i> (FJ233196)             | H: kiwifruit                                                                                      | China       | 100 | 100 |
|    |        | Hypocreales sp. (EU754934)                        | IS: soil and roots of oilseed rape, ES                                                            |             | 100 | 100 |
|    |        | <i>Gibberella avenacea</i> is. (EU255801)         |                                                                                                   |             | 100 | 100 |
|    |        | u. <i>Fusarium</i> c. (EU003042)                  | H: apple seedling, IS: roots, ES                                                                  |             | 100 | 100 |
|    |        | u. soil fungus c. (DQ421028)                      | IS: soil, ES                                                                                      | USA: MN     | 100 | 100 |
|    |        | <i>Fusarium tricinctum</i> (AY188923)             |                                                                                                   |             | 100 | 100 |
|    |        | Fungal endophyte is. (EU167917)                   | H: <i>Picrorhiza kurroa</i>                                                                       |             | 99  | 100 |
|    |        | u. <i>Gibberella</i> (FM178250)                   | IS: malthouse waste water, ES                                                                     |             | 100 | 99  |
|    |        | <i>Gibberella pulicaris</i> st. (FJ481029)        | H: poplar, IS: root                                                                               |             | 100 | 99  |

Name, source, provenance country, query coverage and max ident of sequences from GenBank are indicated. Abbreviations: uncultured (u.), clone (c.), strain (st.), Host (H), Isolation Source (IS), Tissue Type (TT), Environmental Sample (ES)
